# Supplementary material for: Absolute asymmetric Strecker synthesis in a mixed aqueous medium: reliable access to enantioenriched α-aminonitrile
Source: Royal Society of Chemistry journal article supplement (doi:10.1039/c8ob03092h), 2019-01-01

**Electronic supplementary information (ESI):**

**Table S1** (Continuation of Table 1). The absolute handedness and the value of ee in *p*-tolylglycine nitrile **4** obtained from Strecker reaction under aqueous condition.

| Entry | $\alpha$ -Aminonitrile <b>4</b> |                        |
|-------|---------------------------------|------------------------|
|       | ee <sup>a</sup> / % (Config.)   | Yield <sup>b</sup> (%) |
| 9     | 99 (L)                          | 70                     |
| 10    | 99 (L)                          | 63                     |
| 11    | 99 (D)                          | 58                     |
| 12    | 3 (L)                           | 55                     |
| 13    | 99 (L)                          | 52                     |
| 14    | 14 (D)                          | 56                     |
| 15    | 99 (L)                          | 65                     |
| 16    | >99 (D)                         | 54                     |
| 17    | 99 (L)                          | 61                     |
| 18    | >99 (D)                         | 67                     |
| 19    | 99 (D)                          | 43                     |
| 20    | 17 (L)                          | 49                     |
| 21    | 99 (D)                          | 41                     |
| 22    | 99 (L)                          | 58                     |
| 23    | 98 (D)                          | 65                     |

<sup>a</sup> The ee value was determined by high performance liquid chromatography (HPLC) on a chiral stationary phase. <sup>b</sup> The isolated yield of crystalline product by the filtration. The product in the filtrate was not included.

**Table S2.** The progress of Strecker reaction by the analysis of suspended solid.

| Time / h | Suspended solids                                |                                 |
|----------|-------------------------------------------------|---------------------------------|
|          | Molar ratio <sup>a</sup> of <b>3</b> / <b>4</b> | ee <sup>b</sup> / % of <b>4</b> |
| 0        | —                                               | —                               |
| 24       | >95 / <5                                        | —                               |
| 48       | 38 / 62                                         | 96                              |
| 72       | <5 / >95                                        | 99 <sup>c</sup>                 |

<sup>a</sup> Determined by <sup>1</sup>H-NMR. <sup>b</sup> Determined by chiral HPLC analysis. <sup>c</sup> The chemical yield was 65%, which was indicated in Table 1, Entry 1.



**Table S3.** Generation and amplification of solid-state ee of **2**.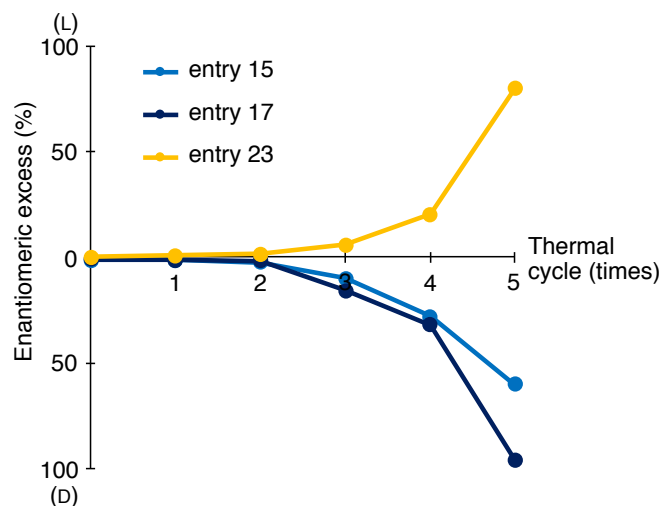

| Entry # of<br>Table 2 | ee /% of suspended <b>4</b> (Configuration) |                 |                 |                 |                 | Yield <sup>c</sup> / % |
|-----------------------|---------------------------------------------|-----------------|-----------------|-----------------|-----------------|------------------------|
|                       | 1 <sup>st</sup>                             | 2 <sup>nd</sup> | 3 <sup>rd</sup> | 4 <sup>th</sup> | 5 <sup>th</sup> |                        |
| 1                     | BDL                                         | BDL             | 12 (L)          | 26 (L)          | 71 (L)          | 38                     |
| 2                     | BDL                                         | 2.1 (D)         | 2.5 (D)         | 17 (D)          | 96 (D)          | 40                     |
| 15                    | BDL                                         | 2.3 (D)         | 10 (D)          | 28 (D)          | 60 (D)          | 42                     |
| 17                    | BDL                                         | BDL             | 15.6 (D)        | 32 (D)          | 96 (D)          | 49                     |
| 23                    | BDL                                         | BDL             | 6.0 (L)         | 20 (L)          | 80 (L)          | 32                     |

<sup>a</sup> The reaction was gradually proceeded for ca. three days and the product was obtained without heating-cooling cycles. <sup>b</sup> The ee was determined by using HPLC with a chiral stationary phase. <sup>c</sup> The solid product **3** was isolated by the filtration of reaction mixture and its recovered yield was described here. The product **3** in the solution-phase was not isolated. <sup>d</sup> In these entries, initially obtained methanol suspension was separated in four portions after the complete dissolution, then each solid **3** was submitted to the thermal cycles to obtain enantiomerically enriched **3**.



**Table S4** (Continuation of Table 2). The absolute handedness and ee of aminonitrile **4** obtained from Strecker reaction in MeOH followed by the heating-cooling cycle.

| Entry | $\alpha$ -Aminonitrile <b>4</b> |                        | Thermal cycle |
|-------|---------------------------------|------------------------|---------------|
|       | ee <sup>a</sup> (%)             | Yield <sup>b</sup> (%) |               |
| 11    | 94 (L)                          | 21                     | 5             |
| 12    | 40 (L)                          | 25                     | 7             |
| 13    | 38 (D)                          | 29                     | 5             |
| 14    | 95 (L)                          | 16                     | 5             |
| 15    | 60 (D)                          | 42                     | 5             |
| 16    | 2.8 (L)                         | 43                     | 4             |
| 17    | 96 (D)                          | 49                     | 5             |
| 18    | 78 (D)                          | 43                     | 6             |
| 19    | 4.0 (L)                         | 49                     | 4             |
| 20    | 6.2 (D)                         | 48                     | 4             |
| 21    | 18 (L)                          | 46                     | 4             |
| 22    | 51 (D)                          | 33                     | 5             |
| 23    | 80 (L)                          | 32                     | 5             |
| 24    | 40 (D)                          | 35                     | 6             |
| 25    | 11 (D)                          | 38                     | 6             |

<sup>a</sup> The ee was determined by using HPLC with a chiral stationary phase. <sup>b</sup> The solid product **3** was isolated by the filtration of reaction mixture and its recovered yield was described here. The product **3** in the solution-phase was not isolated. <sup>c</sup> Generation and amplification of ee was monitored as shown in Fig. 3b. <sup>d</sup> After the precipitation of **4**, the suspension was stirred for 13 h and dissolved by the addition of CHCl<sub>3</sub>, which was separated into two portions. Then after the concentration, thermal cycle was applied to the suspension of resulting solid **4** in 1 M DBU in methanol, independently. <sup>e</sup> After the precipitation of **4**, the suspension was stirred for 15 h, which was divided into four portions in the same procedure in entries 5 and 6. Then the thermal cycle was conducted independently.



**Table S5** (Continuation of Table 3). Emergence of enantiomeric imbalances of aminonitrile **4** synthesized by the repetition of heating-cooling of the *rac*-**4** obtained from the homogeneous solution without the addition of any chiral materials.

| Entry | $\alpha$ -Aminonitrile <b>3</b> |                        | Thermal cycle |
|-------|---------------------------------|------------------------|---------------|
|       | ee <sup>a</sup> / % (Config.)   | Yield <sup>b</sup> / % |               |
| 9     | 30 (D)                          | 38                     | 8             |
| 10    | 77 (D)                          | 46                     | 7             |
| 11    | 95 (L)                          | 44                     | 8             |
| 12    | 95 (L)                          | 42                     | 8             |
| 13    | 77 (D)                          | 57                     | 9             |
| 14    | 72 (L)                          | 36                     | 7             |
| 15    | 86 (L)                          | 56                     | 9             |
| 16    | 94 (D)                          | —                      | 11            |
| 17    | 95 (D)                          | —                      | 11            |
| 18    | 90 (L)                          | —                      | 11            |
| 19    | 94 (D)                          | —                      | 11            |
| 20    | >99.5 (L)                       | 48                     | 9             |
| 21    | 94 (D)                          | 49                     | 9             |
| 22    | >99 (L)                         | 50                     | 5             |
| 23    | 93 (L)                          | 47                     | 8             |
| 24    | 96 (D)                          | 53                     | 13            |
| 25    | 53 (D)                          | 58                     | 9             |

<sup>a</sup> The ee was determined by using HPLC with a chiral stationary phase. <sup>b</sup> The solid product **3** was isolated by the filtration of reaction mixture and its recovered yield was described here. The product **3** in the solution-phase was not isolated. <sup>c,d</sup> Strecker reaction was performed in the same reaction vessel. After removal of DBU, the mixture was separated in two portions and submitted to the thermal amplification independently. <sup>e</sup> Methanol was used instead of DBU.



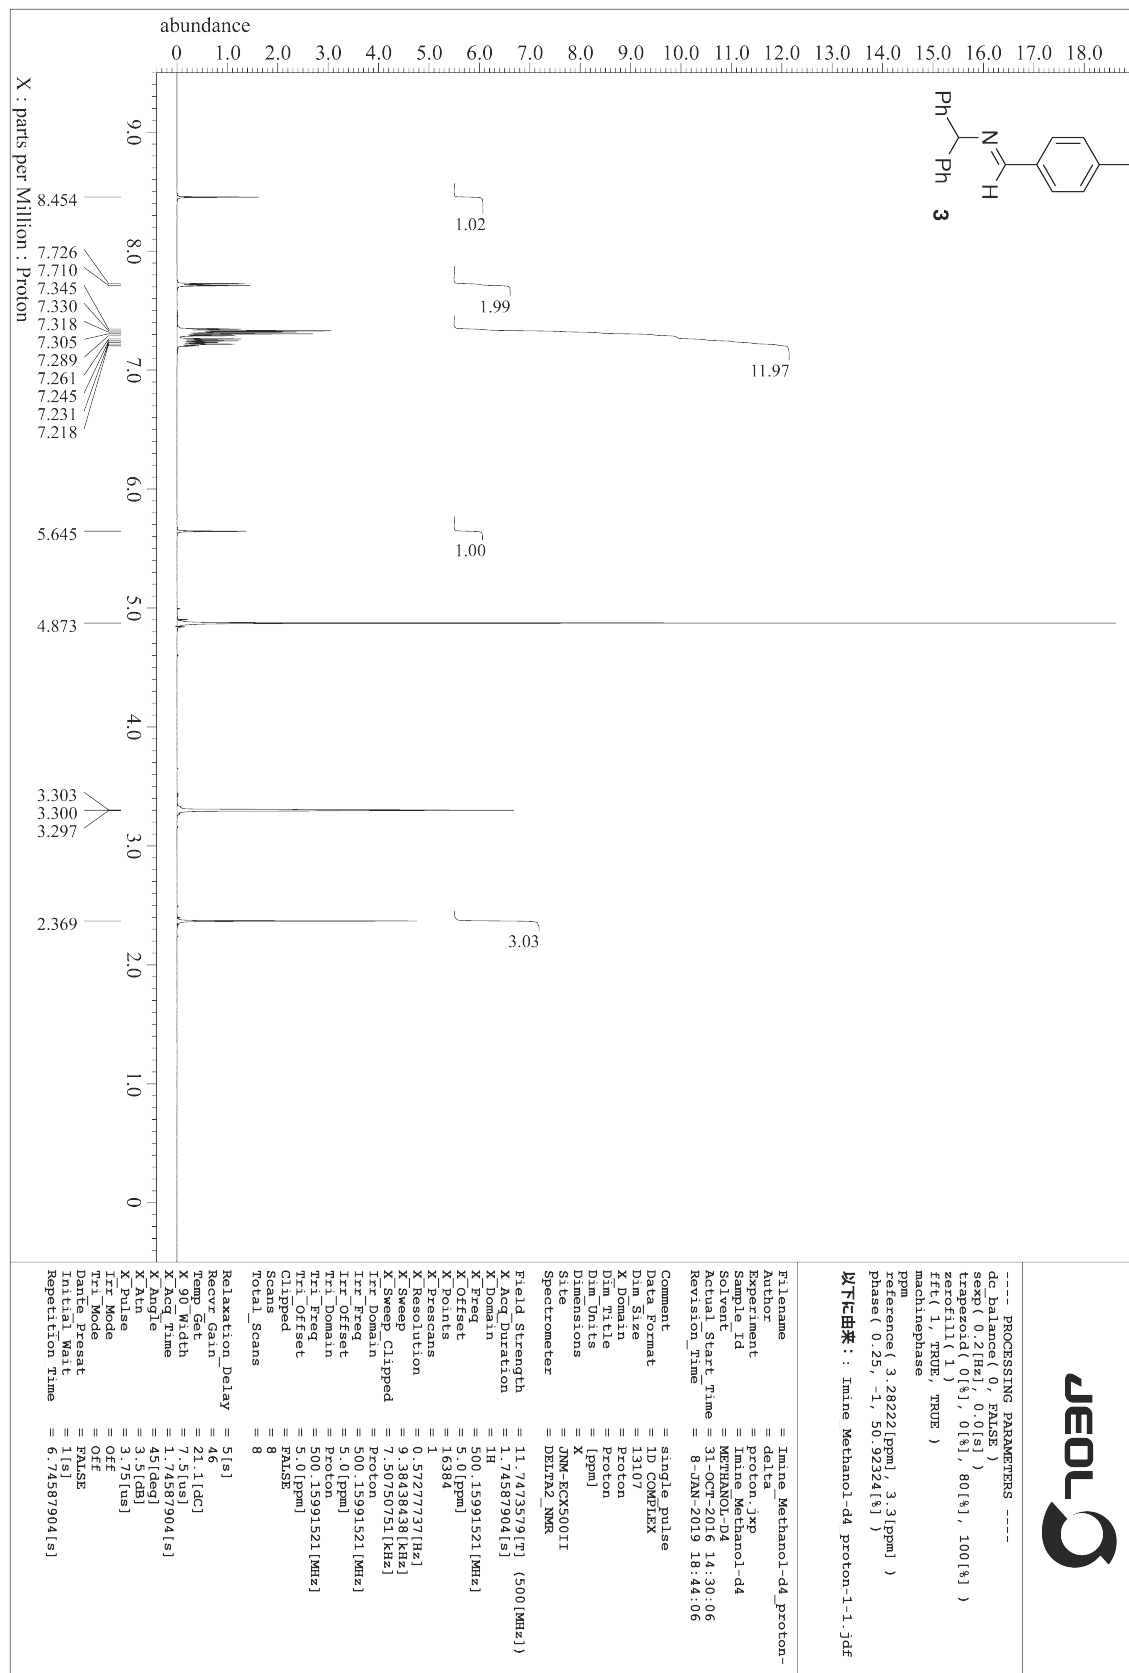



<sup>1</sup>H NMR spectrum of aminonitrile **4** (500 MHz, methanol-*d*<sub>4</sub>, 3.30 ppm)

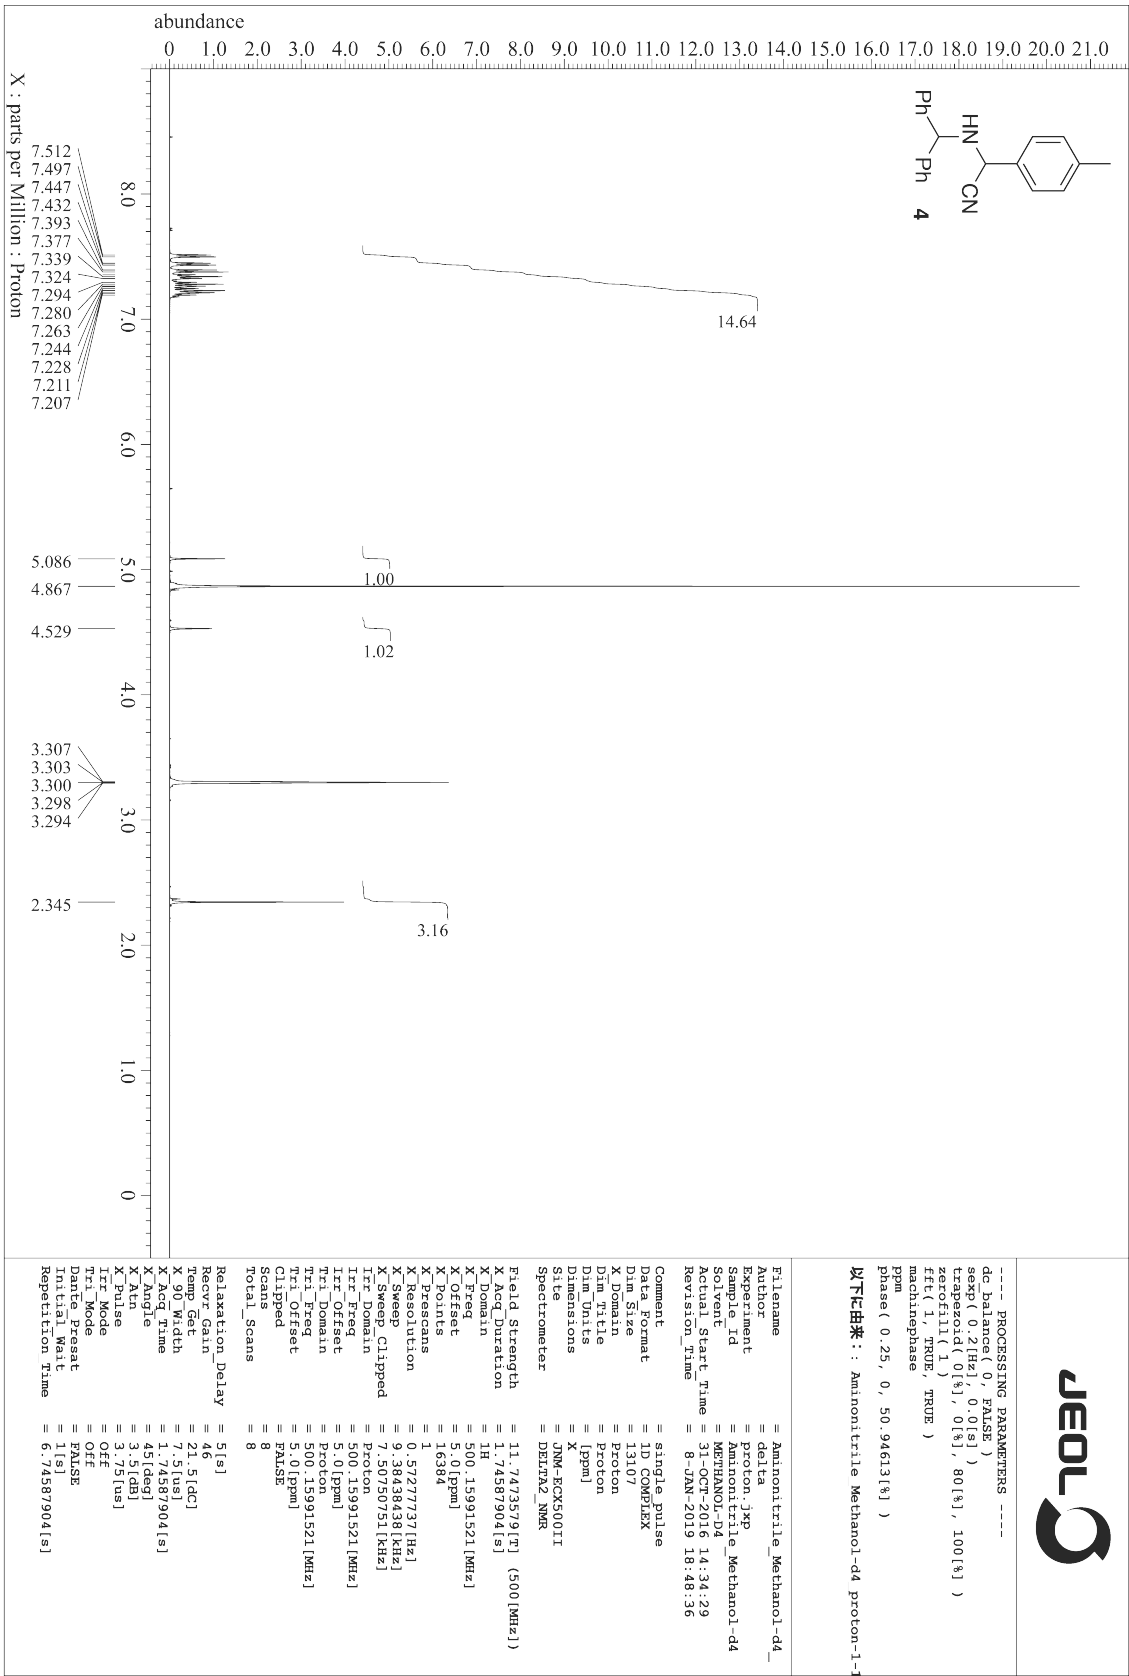

Supplement: c8ob03092h1.pdf [file c8ob03092h1.pdf]
